# Supplementary material for: Determining the Influence of Habitual Dietary Protein Intake on Physiological Muscle Parameters in Youth and Older Age
Source: MDPI journal article supplement (doi:10.3390/nu13103560), 2021-10-12
Supplement: s1 [file s1]

## Supplementary Materials

**Table S1.** Differences in dietary intake between young and older adults

|                  | Young<br>Per kg WBLM | Older<br>Per kg WBLM | Young<br>Per kg BW | Older<br>Per kg BW |
|------------------|----------------------|----------------------|--------------------|--------------------|
| Protein (g)      | 1.46 ± 0.15          | 1.76 ± 0.10          | 1.21 ± 0.10        | 1.13 ± 0.06        |
| Fat (g)          | 1.37 ± 0.15          | 1.30 ± 0.11          | 1.14 ± 0.10        | 0.83 ± 0.06*       |
| Carbohydrate (g) | 3.71 ± 0.43          | 4.08 ± 0.29          | 3.04 ± 0.22        | 2.62 ± 0.17        |
| Leucine (mg)     | 40.84 ± 8.09         | 36.77 ± 4.90         | 33.33 ± 5.30       | 23.57 ± 11.89      |

Abbreviations: WBLM, whole-body lean mass; BW, body weight. N = 11 young and N = 16 older adults. \* represents a statistically significant difference compared to younger adults ( $P < .05$ ). All data presented as mean ± SEM.
